# Supplementary material for: Synergism of mechanical activation and sulfurization to recover copper from waste printed circuit boards
Source: Royal Society of Chemistry journal article supplement (doi:10.1039/c4ra08265f), 2014-01-01
Supplement: c4ra08265f1.pdf [file c4ra08265f1.pdf]

## Supporting information for **Synergism of mechanical activation and sulfurization to recover copper from waste printed circuit boards**

Zhiyuan Ou,<sup>a,\*</sup> and Jinhui Li<sup>a,\*</sup>,

<sup>a</sup> *State Key Joint Laboratory of Environment Simulation and Pollution Control,  
School of Environment, Tsinghua University, Beijing 100084, China*

**Table S1.** Elemental compositions (wt%) in Area-IV~VI, Figure 1-B, from the energy dispersive X-ray analysis.

| Type    | C     | O     | Cu    | Al   | Au <sup>[a]</sup> |
|---------|-------|-------|-------|------|-------------------|
| Area-IV | 1.26  | -     | 79.24 | -    | 19.50             |
| Area-V  | 12.35 | 2.01  | 58.43 | -    | 27.21             |
| Area-VI | 38.02 | 21.08 | 3.15  | 0.41 | 37.33             |

[a] Au is sprayed on the surface of the samples to improve the conductivity during the SEM analysis.

**Table 2.** Specific species in Cu<sub>2</sub>-xS and corresponding weight percentages (wt%) in different ball-milling time, from the two XRD analyses.

|                      | 5 min |       | 10 min |       | 15 min |       | 20 min |       | 25 min |       | 30 min |       | 40 min |       | 60 min |       |
|----------------------|-------|-------|--------|-------|--------|-------|--------|-------|--------|-------|--------|-------|--------|-------|--------|-------|
| Cu <sub>2</sub> S    | 15.02 | 18.13 | 22.65  | 22.17 | 20.08  | 26.69 | 18.09  | 18.13 | 26.90  | 31.27 | 40.12  | 38.89 | 53.89  | 57.77 | 54.09  | 60.49 |
| Cu <sub>1.96</sub> S | 4.21  | 5.93  | 2.37   | 1.92  | 1.99   | 3.09  | 1.80   | -     | 1.12   | 1.62  | -      | -     | -      | -     | -      | -     |
| Cu <sub>1.95</sub> S | 2.95  | -     | -      | 3.98  | -      | -     | -      | -     | -      | -     | -      | -     | -      | -     | -      | -     |
| Cu <sub>1.92</sub> S | -     | -     | 4.04   | -     | -      | -     | -      | -     | -      | -     | -      | -     | -      | -     | -      | -     |

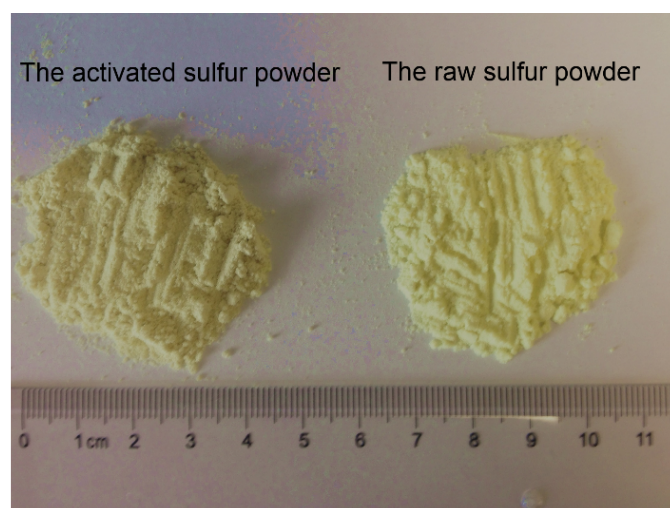

**Figure S1.** The raw sulfur powder and the activated sulfur powder.

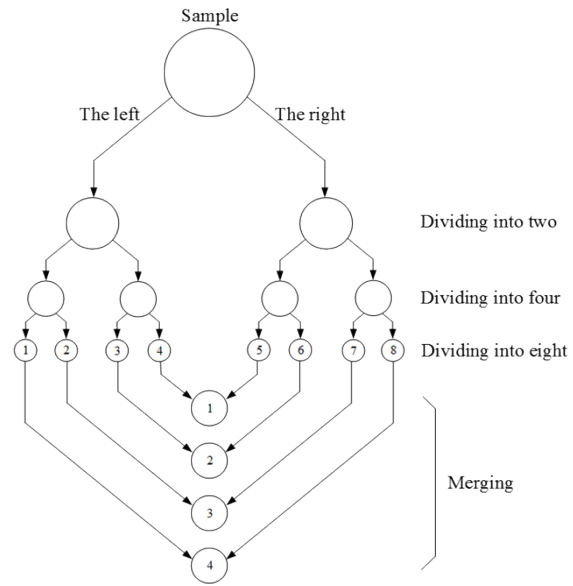

**Figure S2.** The Carpenter left-right balancing method.
